# Supplementary material for: Fate of terrigenous organic matter across the Laptev Sea from the mouth of the Lena River to the deep sea of the Arctic interior
Source: Copernicus journal article supplement (doi:10.5194/bg-2016-159), 2016-05-18
Supplement: Supplementary file 1 [file bg-2016-159-supplement.pdf]

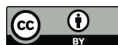

### Supplementary Information

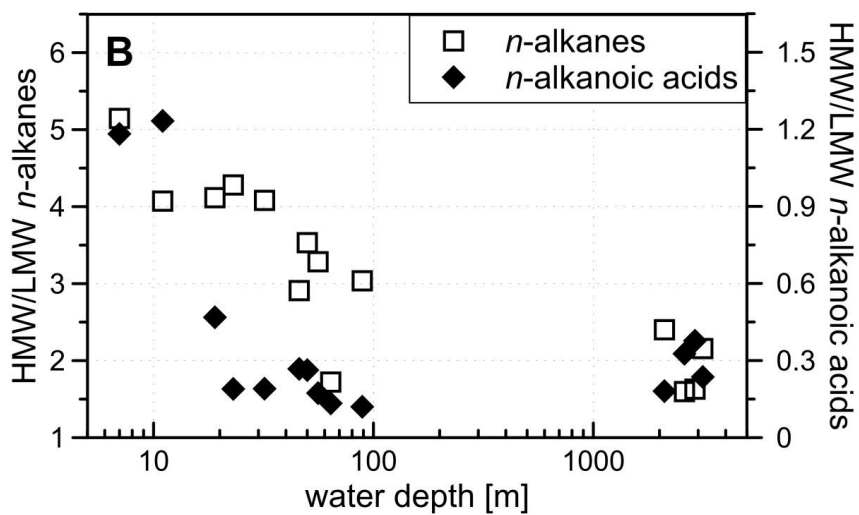

Figure S1: The ratios of high- over low-molecular weight *n*-alkanes and *n*-alkanoic acids decrease along the transect due to dilution with marine OC.
